# Supplementary material for: Hepatic deletion of Mboat7 (LPIAT1) causes activation of SREBP-1c and fatty liver
Source: PubMed Central journal article supplement (PMC8022244; doi:10.1194/jlr.ra120000856), 2021-02-06
Supplement: mmc1.pdf [file mmc1.pdf]

## Supplements

**Supplemental Table S1: Key Resources**

| Reagent or resource                      | Source                       | Identifier                           |
|------------------------------------------|------------------------------|--------------------------------------|
| <b>Antibodies</b>                        |                              |                                      |
| Rabbit anti-SREBP-1c                     | (Rong et al., 2017a)         | N/A                                  |
| Mouse anti-CREB                          | ThermoFisher                 | Cat#35-0900; RRID: AB_2533194        |
| Rabbit anti-SREBP-2                      | (Rong et al., 2017a)         | N/A                                  |
| Rabbit anti-FAS                          | This paper                   | N/A                                  |
| Rabbit anti-ACC1                         | (Kim et al., 2017)           | N/A                                  |
| Rabbit anti-ACC2                         | (Kim et al., 2017)           | N/A                                  |
| Rabbit anti-ACL                          | Abcam                        | Cat#ab40793; RRID: AB_722533         |
| Rabbit anti-Calnexin                     | Enzo                         | Cat#ADI-SPA-860-F; RRID: AB_11178981 |
| Rabbit anti- $\beta$ -actin              | Cell Signaling               | Cat#4970S; RRID: AB_2223172          |
| Mouse anti-EEA1                          | Sigma-Aldrich                | Cat#E7659; RRID: AB_10603495         |
| Mouse anti-GM130                         | BD Transduction Laboratories | Cat#610822; RRID: AB_398141          |
| Mouse anti-Prohibitin                    | Santa Cruz                   | Cat#sc-56467;                        |
| Rabbit anti-COX4                         | ThermoFisher                 | Cat#PA5-29992; RRID: AB_2547466      |
| Rabbit anti-LAMP1                        | Abcam                        | Cat#ab24170; RRID: AB_775978         |
| Guinea pig anti-PLIN2                    | Fitzgerald Industries        | Cat#20R-AP002; RRID: AB_1282475      |
| Rabbit anti- $\alpha$ -tubulin           | Abcam                        | Cat#ab6160; RRID: AB_305328          |
| Mouse anti-PMP70                         | Sigma-Aldrich                | Cat#SAB4200181; RRID: AB_10639362    |
| Rabbit anti-mTOR                         | Cell signaling               | Cat#2983; RRID: AB_2105622           |
| Rabbit anti-phospho-mTOR                 | Cell signaling               | Cat#2974; RRID: AB_2262884           |
| Rabbit anti-S6 ribosomal protein         | Cell signaling               | Cat#2217; RRID: AB_331355            |
| Rabbit anti-phospho-S6 ribosomal protein | Cell signaling               | Cat#5364; RRID: AB_10694233          |
| Rabbit anti-AKT                          | Cell signaling               | Cat#4685; RRID: AB_2225340           |
| Rabbit anti-phospho-AKT(Ser473)          | Cell signaling               | Cat#4060; RRID: AB_2315049           |
| Rabbit anti-phospho-AKT(Thr308)          | Cell signaling               | Cat#13038; RRID: AB_2629447          |
| Rabbit anti-IRS1                         | Cell signaling               | Cat#2382; RRID: AB_330333            |
| Rabbit anti-phospho-IRS1(Ser318)         | Cell signaling               | Cat#5610; RRID: AB_10695244          |
| Rabbit anti-IRS2                         | Cell signaling               | Cat#4502; RRID: AB_2125774           |
| Rabbit anti-phospho-IRS2(Ser388)         | Sigma-Aldrich                | Cat#07-1517; RRID: N/A               |
| <b>Lysophospholipids</b>                 |                              |                                      |
| 16:0-d31 Lyso PC                         | Avanti                       | Cat#860397                           |
| 17:1 Lyso PI                             | Avanti                       | Cat#850103                           |
| 17:1 Lyso PE                             | Avanti                       | Cat#856707                           |
| 17:1 Lyso PG                             | Avanti                       | Cat#858127                           |
| 16:0 Coenzyme A                          | Avanti                       | Cat#870716                           |
| 18:0 Coenzyme A                          | Avanti                       | Cat#870718                           |
| 18:1 (n9) Coenzyme A                     | Avanti                       | Cat#870719                           |
| 18:2 (n6) Coenzyme A                     | Avanti                       | Cat#870736                           |
| 18:3 (n3) Coenzyme A                     | Avanti                       | Cat#870732                           |

|                 |        |            |
|-----------------|--------|------------|
| 20:4 Coenzyme A | Avanti | Cat#870721 |
| 22:6 Coenzyme A | Avanti | Cat#870728 |

---

**Critical Commercial Assays, Reagents**


---

|                                                  |                    |                   |
|--------------------------------------------------|--------------------|-------------------|
| Tyloxapol (triton WR-1339)                       | Sigma-Aldrich      | Cat#T8761         |
| RNA STAT-60 kit                                  | TEL TEST           | Cat#NC9489785     |
| DNA-free, DNA removal kit                        | Invitrogen         | Cat#1906          |
| Taqman reverse transcription reagents            | Applied Biosystems | Cat#N8080234      |
| 2× SYBR Green PCR master Mix                     | Applied Biosystems | Cat#4309155       |
| Ultra Sensitive Mouse Insulin ELISA Kit          | Crystal Chem       | Cat#90080         |
| Formalin Solution, neutral buffered, 10%         | Sigma-Aldrich      | Cat#HT501320-9.5L |
| Roche protease inhibitor                         | Roche              | Cat#1836170       |
| SuperSignal West Pico Chemiluminescent Substrate | ThermoScientific   | Cat#34580         |
| Pierce BCA Protein Assay Kit                     | ThermoScientific   | Cat#23225         |

---

**Oligonucleotides**


---

|                                          |                             |     |
|------------------------------------------|-----------------------------|-----|
| MBOAT7                                   | Integrated DNA Technologies | N/A |
| 5' primer 5'-CCTCCCTGATGGAGACACTCA-3'    |                             |     |
| 3' primer 5'-GGTGCGGTAGCGGAAGAAC-3'      |                             |     |
| TMC4                                     | Integrated DNA Technologies | N/A |
| 5' primer 5'-                            |                             |     |
| TCAACACTGCTAAGTTCCTCATACTGT-3'           |                             |     |
| 3' primer 5'-GCCGGTGAGTAGATGGAGAAGA-3'   |                             |     |
| ACS                                      | Integrated DNA Technologies | N/A |
| 5' primer 5'-GCTGCCGACGGGATCAG-3';       |                             |     |
| 3' primer 5'-TCCAGACACATTGAGCATGTCAT-3'  |                             |     |
| ACL                                      | Integrated DNA Technologies | N/A |
| 5' primer 5'-GCCAGCGGGAGCACATC-3';       |                             |     |
| 3' primer 5'-CTTTGCAGGTGCCACTTCATC-3'    |                             |     |
| ACC1                                     | Integrated DNA Technologies | N/A |
| 5' primer 5'-CACGGGCAGTCTACCACAGA-3';    |                             |     |
| 3' primer 5'-AGTGGAAACTCGATGGAGCTT-3'    |                             |     |
| ACC2                                     | Integrated DNA Technologies | N/A |
| 5' primer 5'-CTTGCGTGTTTGGAAAAGGAAAA-3'; |                             |     |
| 3' primer 5'-TCCACCGTATACTGCATCAGCTT-3'  |                             |     |
| FAS                                      | Integrated DNA Technologies | N/A |
| 5' primer 5'-GCTGCGGAACTTCAGGAAAT-3';    |                             |     |
| 3' primer 5'-AGAGACGTGTCACTCCTGGACTT-3'  |                             |     |
| PNPLA3                                   | Integrated DNA Technologies | N/A |
| 5' primer 5'-GCAGAGAAAGCAGGTTTATTCGA-    |                             |     |
| 3';                                      |                             |     |
| 3' primer 5'-                            |                             |     |
| GCCTCCTGTTGGTATCTTAAAGATTAA-3'           |                             |     |
| ELOVL6                                   | Integrated DNA Technologies | N/A |
| 5' primer 5'-TGTACGCTGCCTTTATCTTTGG-3';  |                             |     |
| 3' primer 5'-GCGGCTTCCGAAGTTCAA-3'       |                             |     |
| SCD-1                                    | Integrated DNA Technologies | N/A |
| 5' primer 5'-CCGGAGACCCCTTAGATCGA-3'     |                             |     |
| 3' primer 5'-                            |                             |     |
| TAGCCTGTAAAAGATTTCTGCAAACC-3'            |                             |     |
| HMGS                                     | Integrated DNA Technologies | N/A |
| 5' primer 5'-GCCGTGAACTGGGTCGAA-3'       |                             |     |

|                                               |                                |     |
|-----------------------------------------------|--------------------------------|-----|
| 3' primer 5'-<br>GCATATATAGCAATGTCTCCTGCAA-3' |                                |     |
| HMGR                                          | Integrated DNA<br>Technologies | N/A |
| 5' primer 5'-CTTGTGGAATGCCTTGTGATTG-3'        |                                |     |
| 3' primer 5'-AGCCGAAGCAGCACATGAT-3'           |                                |     |
| DHCR24                                        | Integrated DNA<br>Technologies | N/A |
| 5' primer 5'-AGGCAGCTGGAGAAGTTTGTG-3'         |                                |     |
| 3' primer 5'-CCTCGCGGTTTCATATAGCAATC-3'       |                                |     |
| Cyclophilin                                   | Integrated DNA<br>Technologies | N/A |
| 5' primer 5'-TGGAGAGCACCAAGACAGACA-3'         |                                |     |
| 3' primer 5'-TGCCGGAGTCGACAATGAT-3'           |                                |     |

---

#### Software

|                     |                   |     |
|---------------------|-------------------|-----|
| GraphPad Prism 8.1  | GraphPad software | N/A |
| Image Studio v5.2   | Li-Cor            | N/A |
| Illustrator CC 2017 | Adobe             | N/A |
| Excel               | Microsoft         | N/A |
| Matlab              | Mathworks         | N/A |
| Tracefinder         | ThermoScientific  | N/A |

---

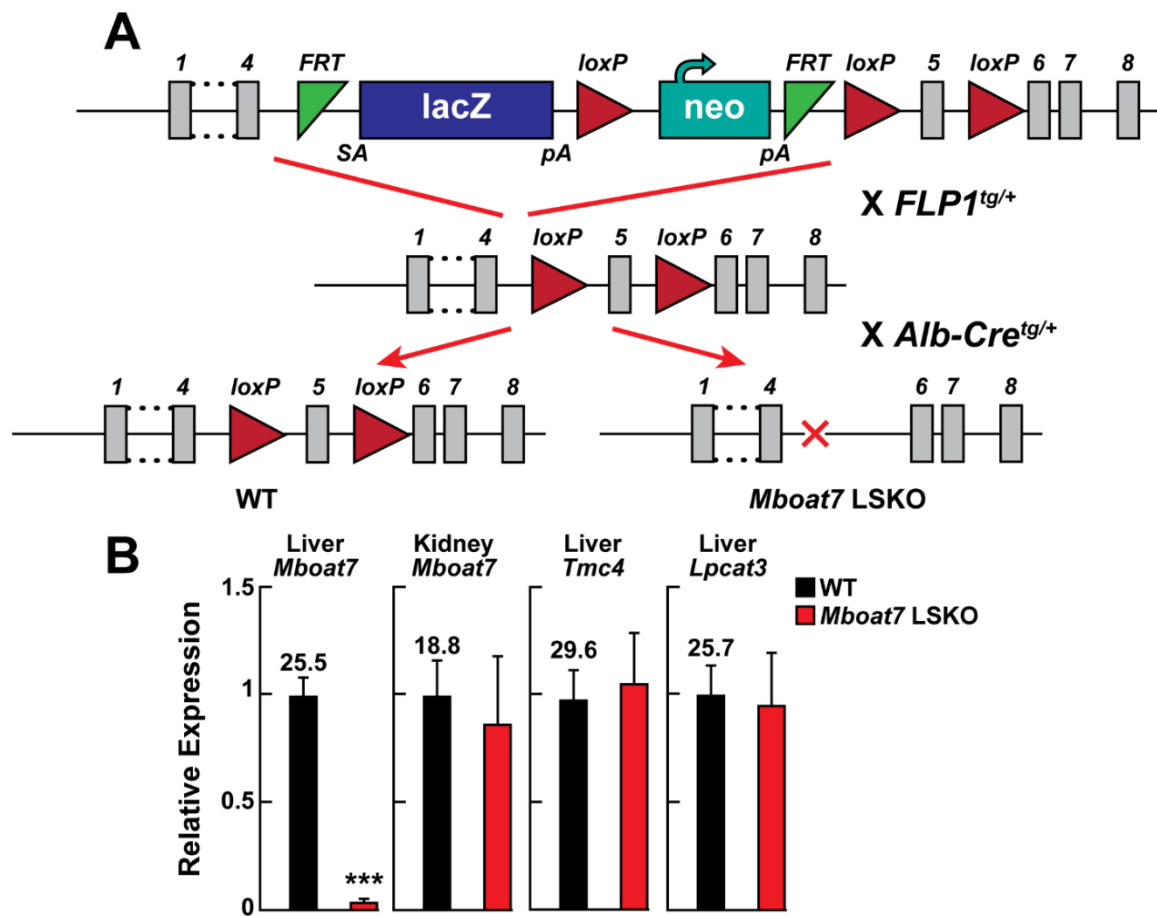

**Supplemental Figure S1.** Liver-specific deletion of mouse *Mboat7*. (A) Amino acid sequence of mouse *Mboat7* is encoded by exons 1-8 of *Mboat7*. CRISPR-Cas9 technology was used to insert one gene targeting construct upstream of exon 5 and another *loxP* site downstream of exon 5. *LacZ* trapping cassette is placed 5' of a *loxP*-flanked, promoter-driven, neomycin-resistance selection cassette in the gene targeting construct. To allow simultaneous removal of both the *lacZ* and neomycin-resistance cassettes, two *FRT* (flippase recognition target) sites are inserted; one upstream of the *lacZ* cassette and one between the neomycin-resistance cassette and the *loxP* site immediately before exon 5. Mice with the targeted allele were crossed with mice expressing FLP1 recombinase to excise the *FRT*-flanked sites, remove both the *lacZ* and neomycin-resistance cassettes, and create heterozygous *Mboat7* floxed (*Mboat7<sup>fl/+</sup>*) mice harboring an allele in which *Mboat7* exon 5 is flanked by two *loxP* sites. *Mboat7<sup>fl/+</sup>* mice were then crossed with *Mboat7<sup>fl/+</sup>* mice to generate homozygous *Mboat7<sup>fl/fl</sup>* mice. Further crossing of homozygous *Mboat7<sup>fl/fl</sup>* mice with Alb-Cre mice of C57BL/6J background generated *Mboat7<sup>fl/fl</sup>* mice with Alb-Cre transgene (*Mboat7* LSKO) and *Mboat7<sup>fl/fl</sup>* mice without Alb-Cre transgene (WT). (B) Detection of exon 5 deletion using PCR amplification of liver mRNA. Total RNA was isolated from livers of WT (- Alb Cre) and *Mboat7* LSKO (+Alb Cre) mice. Real-time PCR analysis of gene expressions in WT and *Mboat7* LSKO mice. The liver *Mboat7* expression was deleted in *Mboat7* LSKO mice, but the *Mboat7* expression in the kidney and the adjacent *Tmc4* and homologous *Mboat5* (*Lpcat3*) gene expressions in the liver were not changed.

**Figure S2**

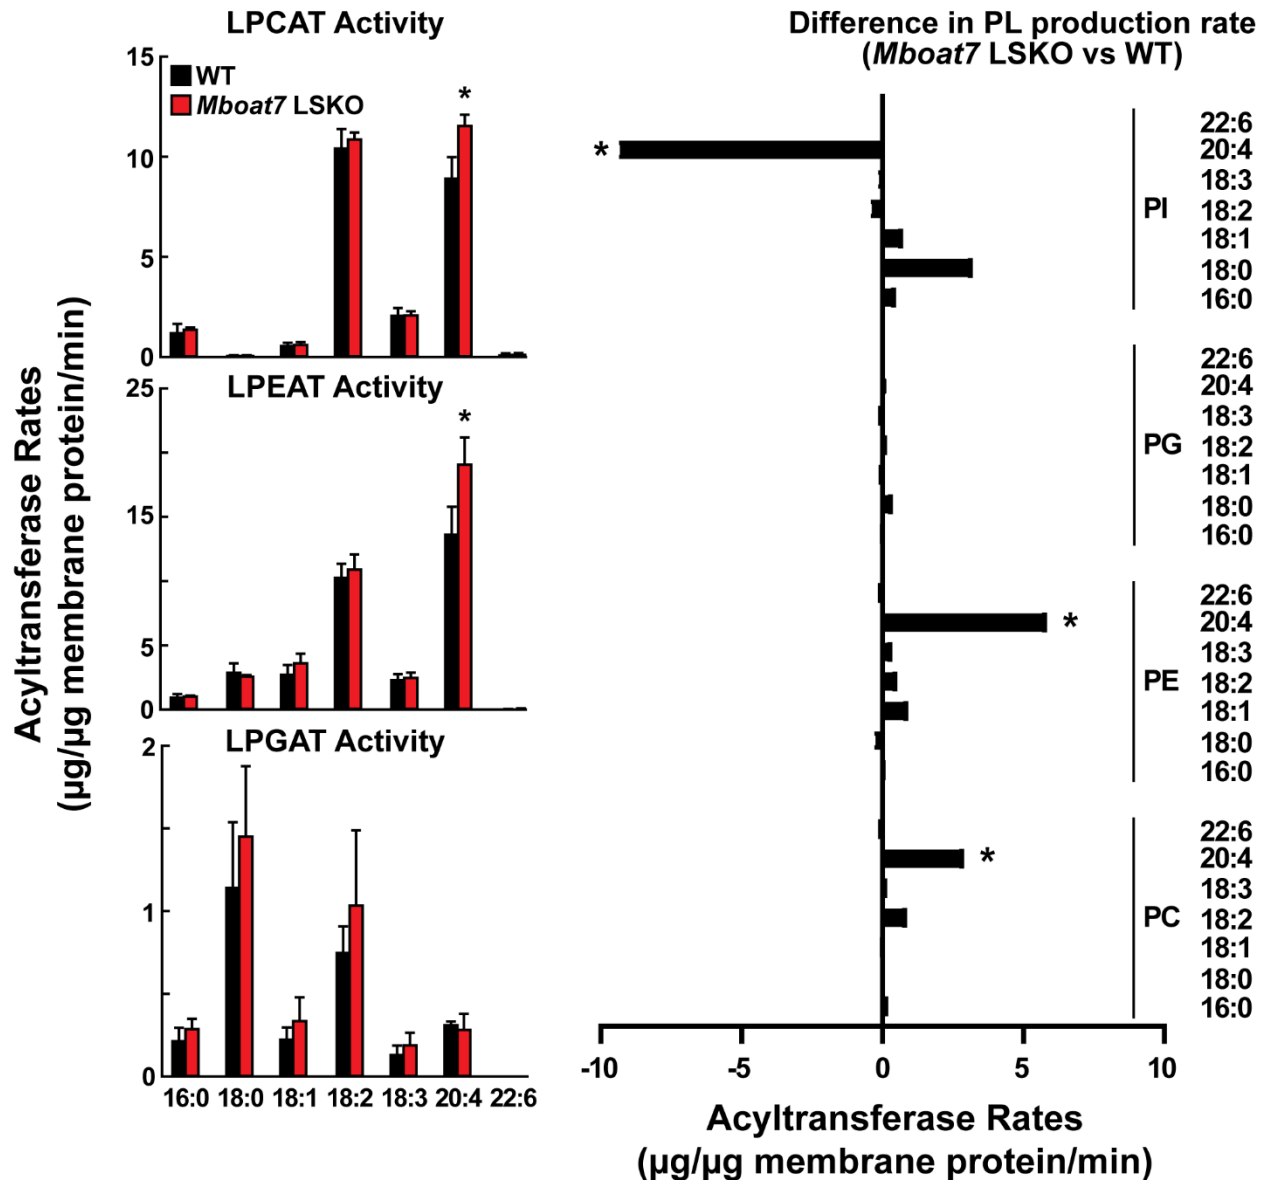

**Supplemental Figure S2.** LPLAT activity in liver membrane fraction from WT and *Mboat7* LSKO mice (n=3 per group). (Left panel) The production rates of deuterium-labeled PC, 17:1 PE and 17:1 PG containing 16:0, 18:0, 18:1, 18:2, 18:3, 20:4 and 22:6 acyl chains were compared between WT and *Mboat7* LSKO mice. (Right panel) Each phospholipid molecular species produced in *Mboat7* LSKO mouse livers was subtracted from that measured in WT mouse livers. The results are expressed as a histogram for each phospholipid molecular species as a less abundant product (bars going left of center) or more abundant product (bars going right of center). Data are presented as mean  $\pm$  SD. Asterisks denote level of statistical significance (Student's t test) between WT and *Mboat7* LSKO mice: \*P<0.05.

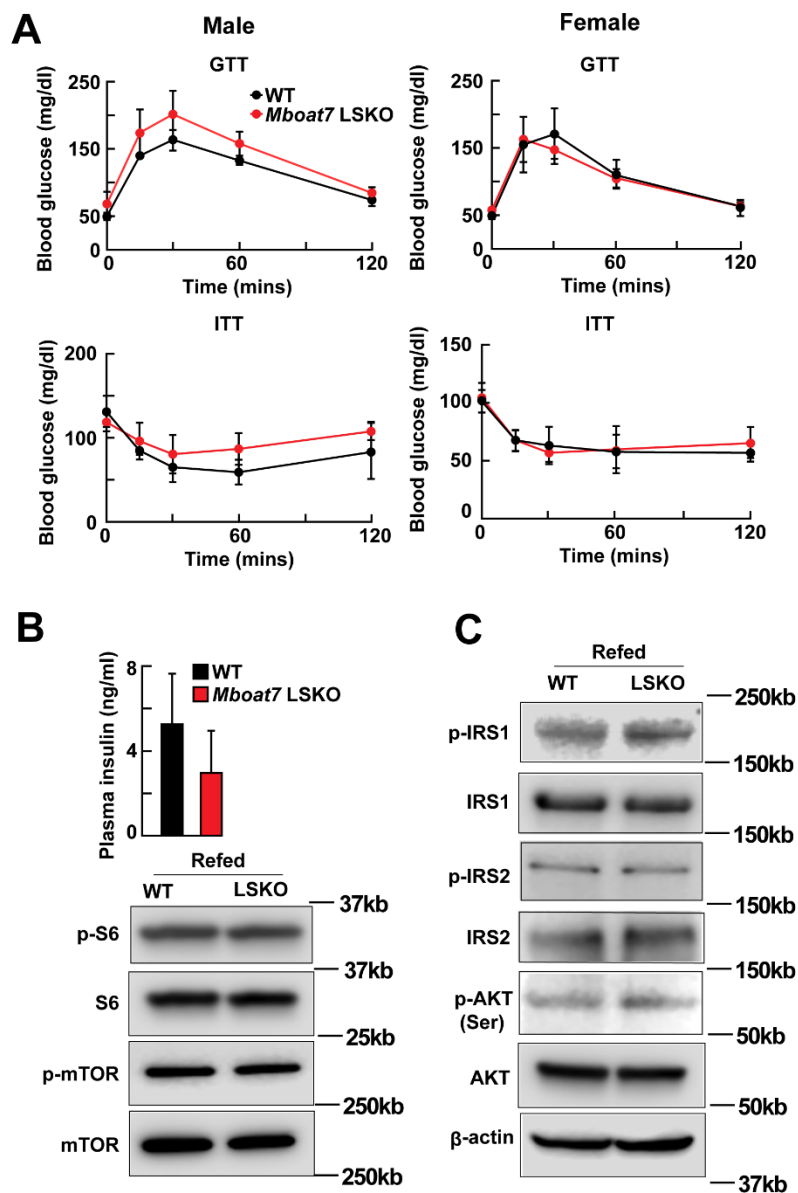

**Supplemental Figure S3.** Liver-specific deletion of mouse *Mboat7* did not influence glucose metabolism and hepatic insulin resistance. (A) Blood glucose levels were measured throughout the course of intraperitoneal glucose tolerance and insulin tolerance tests (n=3-4 per group for male and 4-5 for female cohort). (B) Comparison of plasma insulin between WT and *Mboat7* LSKO mice. (C) Immunoblot analysis of liver expression of proteins targeting at insulin and mTOR signaling pathways. Phospho-AKT(Thr308) was not detectable in either WT or *Mboat7* LSKO mice.

Figure S4

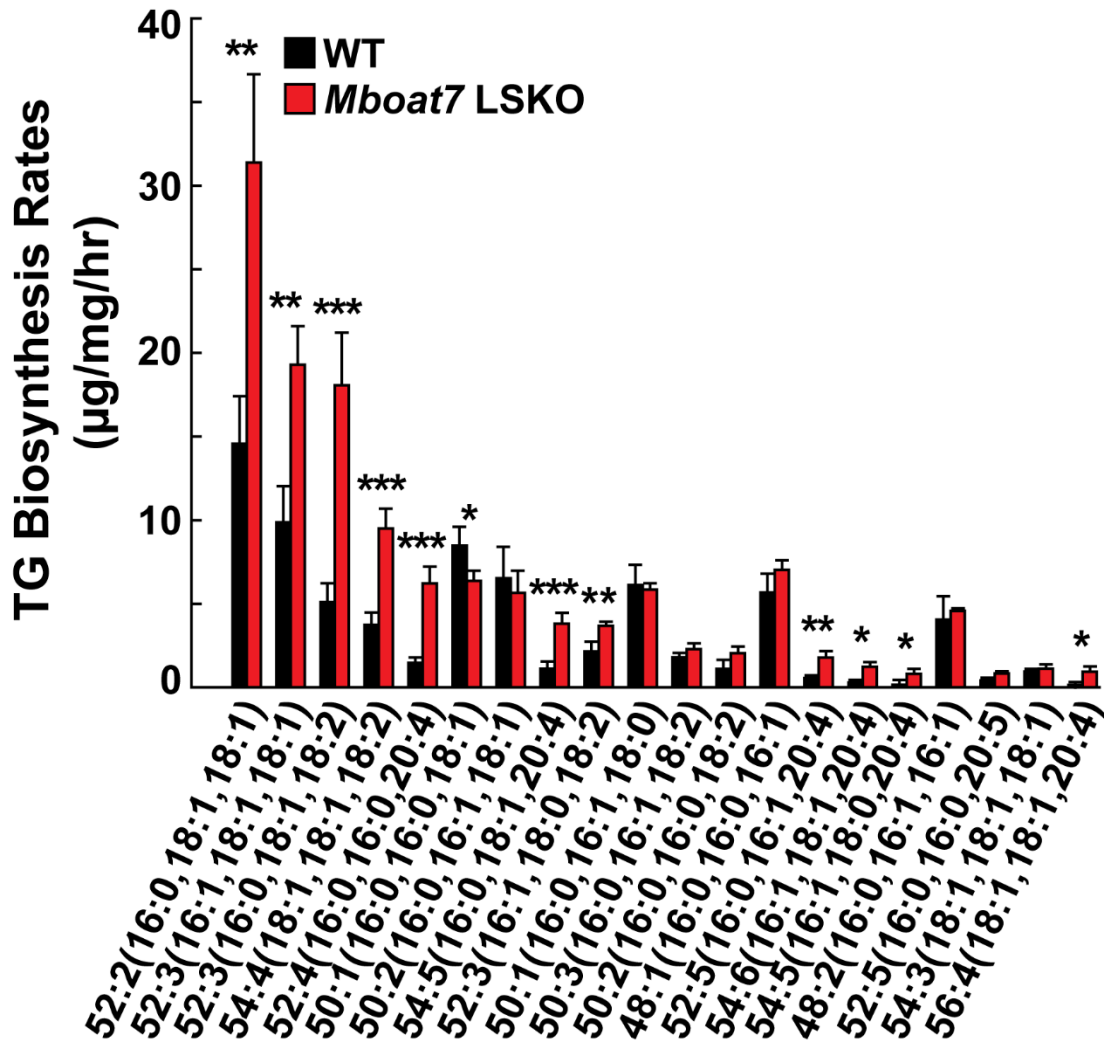

Supplemental Figure S4. Biosynthesis rate of the 20 most abundant TGs species in WT and *Mboat7* LSKO mouse livers. These biosynthesis rates were summed for data shown in Figure 5. Data are presented as mean  $\pm$  SD. Asterisks denote level of statistical significance (Student's *t* test) between WT and *Mboat7* LSKO mice: \*P<0.05, \*\*P<0.005, \*\*\*P<0.001.

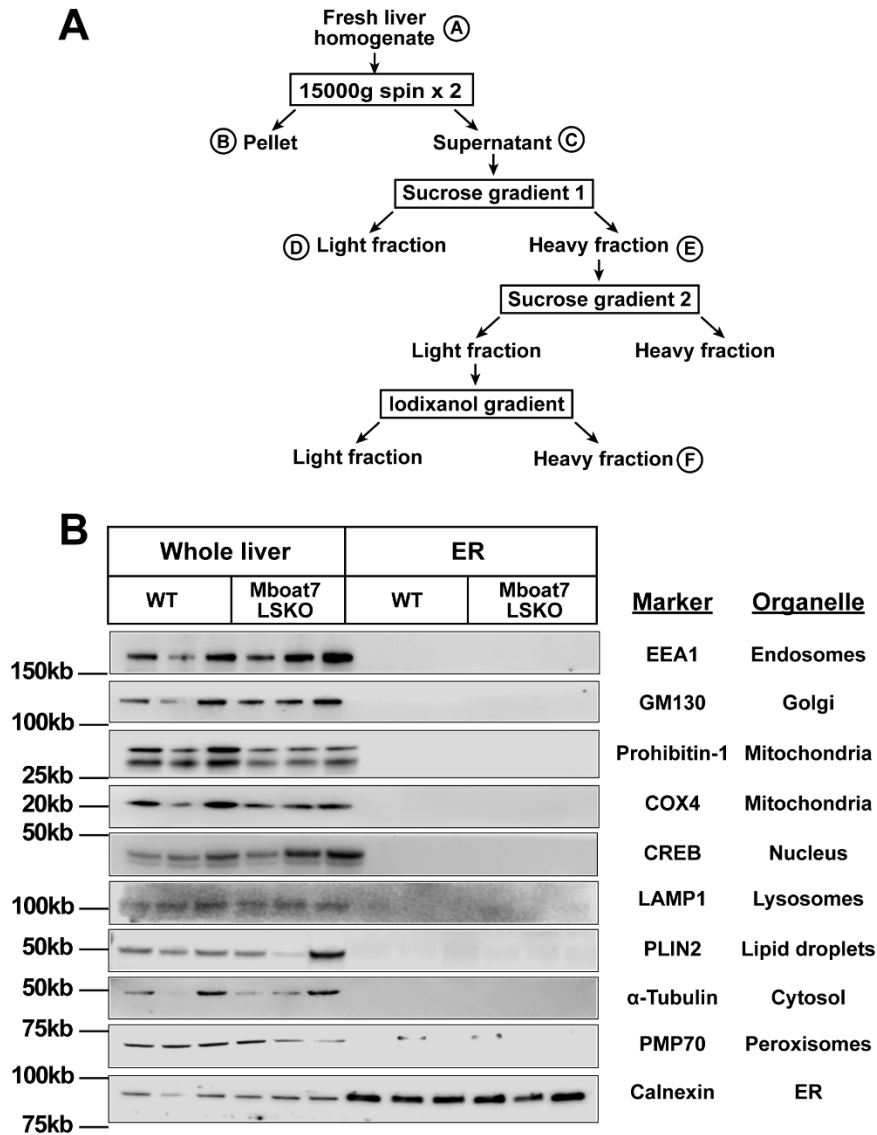

**Supplemental Figure S5.** Purification of ER membranes from fresh mouse liver tissues. (A) Diagram of ER membrane fractionation scheme. (A-F) denote major fractions collected. A, whole liver lysate; F, purified ER fraction. (B) Validation of ER fractionation of mouse liver extracts by immunoblot analysis of subcellular markers. EEA1 is an early endosomal membrane protein and localized exclusively to endosomes. GM130 is a cis-Golgi matrix protein and widely used as a Golgi marker. Prohibitin-1 acts as a foldase/unfoldase for the stabilization of newly synthesized mitochondrial proteins and is a mitochondrial membrane protein marker. COX4 is the component of the respiratory chain and localized exclusively to the inner membrane of mitochondria.
